# Supplementary material for: Peripheral nerve abnormality in HIV leprosy patients
Source: PubMed Central journal article supplement (PMC6066254; doi:10.1371/journal.pntd.0006633), 2018-07-18
Supplement: pntd.0006633.s001.pdf [file pntd.0006633.s001.pdf]

| Variables                                     | No. Observation (%)     |           |           | Statistical test                 |
|-----------------------------------------------|-------------------------|-----------|-----------|----------------------------------|
|                                               | Coinfected <sup>a</sup> |           | Total     |                                  |
|                                               | PB                      | MB        |           |                                  |
| <b>Observations (n=63)</b>                    | 37 (58.7)               | 26 (41.3) | 63 (100)  | Chi-square <sup>a</sup> , p>0.05 |
| <b>HAART</b>                                  |                         |           |           |                                  |
| With HAART                                    | 32 (86.5)               | 23 (88.5) | 55 (87.3) | G-Test <sup>a</sup> , p>0.05     |
| Without HAART                                 | 5 (13.5)                | 3 (11.5)  | 8 (12.7)  |                                  |
| <b>Time of HAART vs. diagnosis of leprosy</b> |                         |           |           |                                  |
| Before HAART                                  | 11 (29.7)               | 8 (30.8)  | 19 (30.2) | G-Test <sup>a</sup> , p>0.05     |
| 0 - 6 months                                  | 14 (37.8)               | 7 (26.9)  | 21 (33.3) |                                  |
| >6 - 12 months                                | 8 (21.6)                | 2 (7.7)   | 10 (15.9) |                                  |
| More than 1 year                              | 5 (13.5)                | 8 (30.8)  | 13 (20.6) |                                  |
